# Supplementary material for: Cooperative catalytic behavior of CoS and Bi2S3 nanoparticles on Zr:BiVO4 photoanodes for enhanced photoelectrochemical sulfite oxidation coupled with pharmaceutical pollution degradation
Source: Royal Society of Chemistry journal article supplement (doi:10.1039/d4en00018h), 2024-01-01
Supplement: d4en00018h1.pdf [file d4en00018h1.pdf]

## Supporting information

### **Cooperative catalytic behavior of CoS and Bi<sub>2</sub>S<sub>3</sub> nanoparticles on Zr:BiVO<sub>4</sub> photoanodes for enhanced photoelectrochemical sulfite oxidation coupled with pharmaceutical pollution degradation**

Prabhakarn Arunachalam,<sup>a</sup> Maged N Shaddad,<sup>b</sup> Mabrook S Amer,<sup>a</sup> Abdulaziz M. Alsalman,<sup>a</sup> Jagannathan. Madhavan<sup>c</sup>

<sup>a</sup>Electrochemical Sciences Research Chair, Department of Chemistry, Science College, King Saud University, Riyadh, Kingdom of Saudi Arabia.

<sup>b</sup>Department of Chemistry, College of Science and Humanities in Al-Kharj, Prince Sattam Bin Abdulaziz University, P.O. Box 173, Al-Kharj 11942, Saudi Arabia.

<sup>c</sup>Solar Energy Lab, Department of Chemistry, Thiruvalluvar University, Vellore 632 115, Tamil Nadu, India.

Corresponding authors:

\* parunachalam@ksu.edu.sa; Tel:+966114673670.

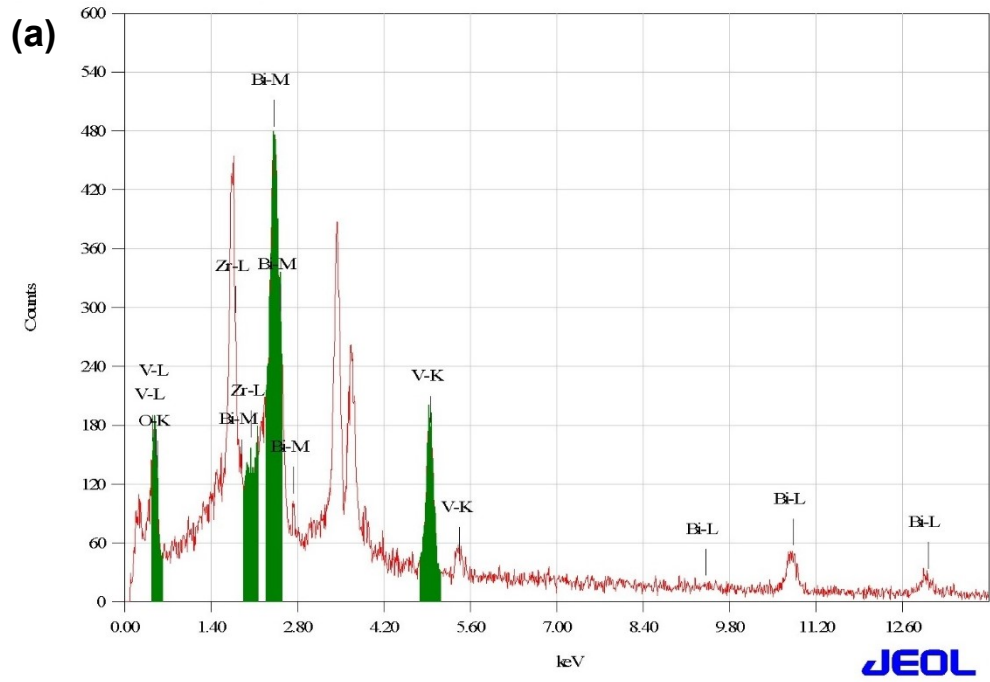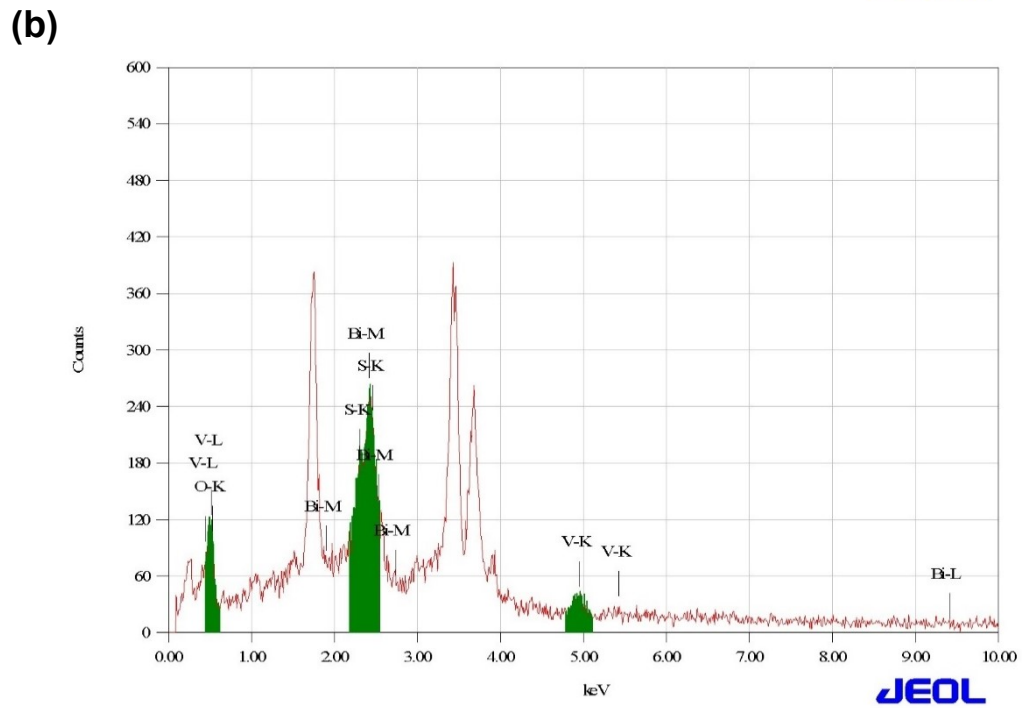

(c)

*JED-2200 Series*

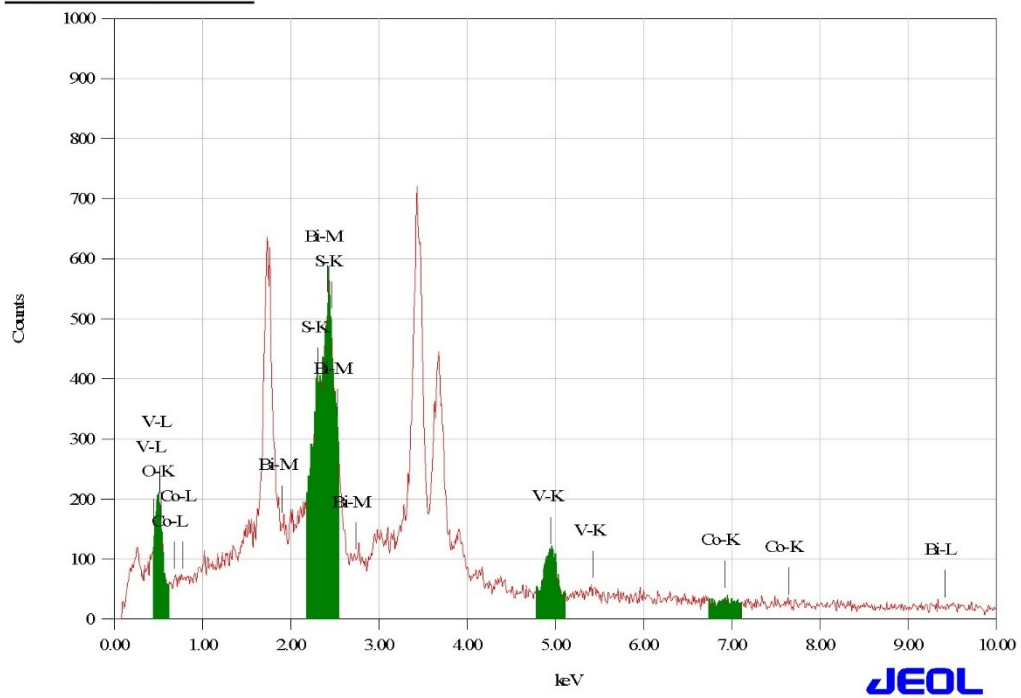

**Figure S1** a) EDS spectrum of the a)  $\text{Zr:BiVO}_4$ , b)  $\text{Zr:BiVO}_4@Bi_2S_3$ , and c)  $\text{Zr:BiVO}_4@Bi_2S_3\text{-CoS}$  electrode.

**Table S1.** Elemental composition obtained from EDAX spectra of prepared materials

| Samples                        | Bi %  | V %   | Zr % | S %   | Co%  | O%    |
|--------------------------------|-------|-------|------|-------|------|-------|
| $\text{Zr:BiVO}_4$             | 52.91 | 22.81 | 0.22 | -     | --   | 24.06 |
| $\text{Zr:BiVO}_4/Bi_2S_3$     | 73.31 | 6.92  | -    | 2.307 | -    | 12.58 |
| $\text{Zr:BiVO}_4/Bi_2S_3@CoS$ | 70.97 | 13.11 | -    | 8.37  | 1.87 | 5.69  |

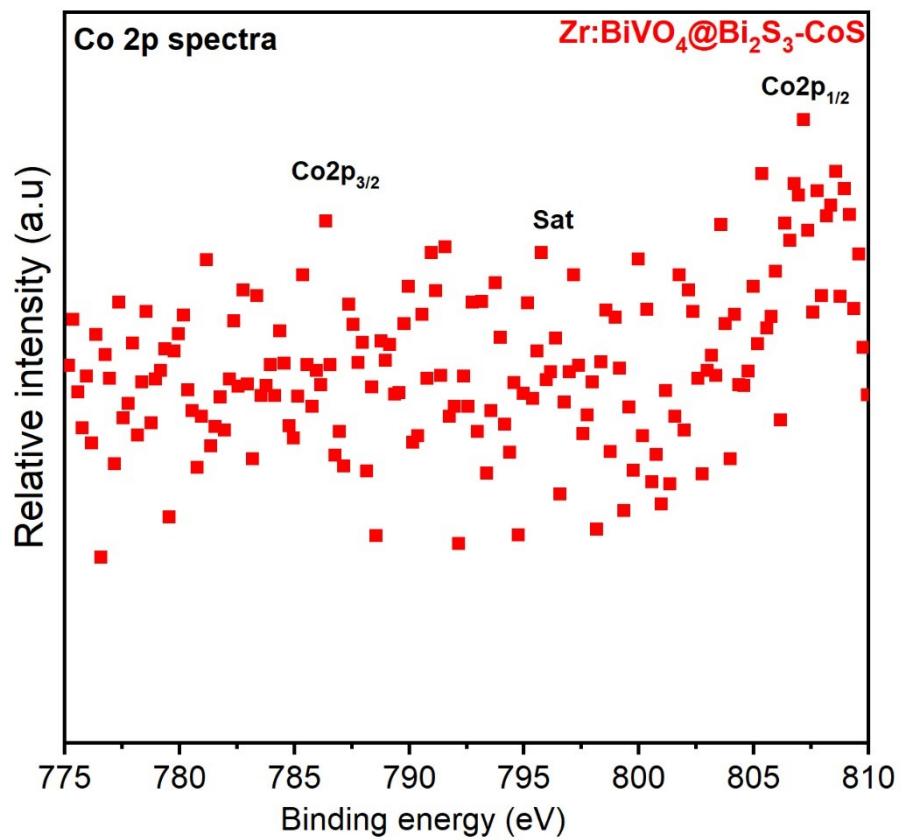

**Figure S2.** Core level Co 2p XPS spectra of Zr:BiVO<sub>4</sub>@Bi<sub>2</sub>S<sub>3</sub>-CoS films

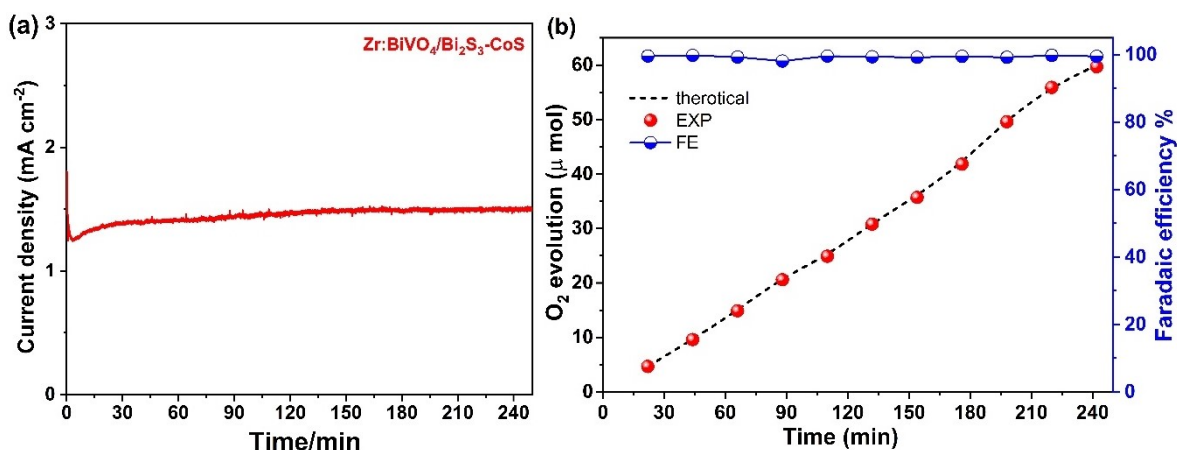

**Figure S3.** (a) Chronoamperometry measurements of fabricated electrodes of Zr:BiVO<sub>4</sub>@Bi<sub>2</sub>S<sub>3</sub>-CoS at 0.1 V<sub>Ag/AgCl</sub> in 0.5 M Na<sub>2</sub>SO<sub>4</sub>. (b) Faradaic efficiency of Zr:BiVO<sub>4</sub>@Bi<sub>2</sub>S<sub>3</sub>-CoS electrodes for the theoretically calculated and experimentally measured O<sub>2</sub> at a potential of 0.1 V<sub>Ag/AgCl</sub>.

The Faradic efficiency of oxygen production for Zr:BiVO<sub>4</sub>@Bi<sub>2</sub>S<sub>3</sub>-CoS photoanode was determined through galvanostatic catalysis at 0.1 V<sub>Ag/AgCl</sub> (Figure S3a). Oxygen generation was measured every 22 minutes by a gas chromatography (Agilent GC-8890) using a constant current over a period of 4 h. At this point, the theoretically calculated oxygen generation and the actual oxygen generation were compared. The theoretically calculated amount of oxygen was determined using the following equation from Faraday's law [1](Mosa et al., 2016) as follows:

$$\eta_{\text{H}_2} \text{ (theoretical)} = Q/nF = I \times t / nF \quad (1)$$

where  $\eta_{\text{O}_2}$  is the theoretically calculated amount of O<sub>2</sub>, Q is the amount of applied charge, n is the number of electrons participating to produce one O<sub>2</sub> molecule (4 electrons), F is the Faraday constant (96485.3 s A mol<sup>-1</sup>), i is the applied current, and t is the reaction time.

Faraday efficiency is calculated using the following equation.

$$\text{Faradaic efficiency} = \eta_{\text{O}_2} \text{ (measured)} / \eta_{\text{O}_2} \text{ (theoretical)} \quad (2)$$

Furthermore, the photoelectrode produced 14.6  $\mu\text{mol}$  of oxygen in an hour (**Figure S3b**), with a Faraday efficiency close to 100%.

**Table S2.** Various kinds of  $\text{BiVO}_4$ -based electrode materials are loaded with different co-catalysts and their PEC properties for water-splitting reactions.

| S.No | Electrode                                          | Electrolyte (pH)                                             | Co-catalyst (Method)                    | Current density ( $\text{mA}/\text{cm}^2$ )  | Ref. |
|------|----------------------------------------------------|--------------------------------------------------------------|-----------------------------------------|----------------------------------------------|------|
| 1    | $\text{BiVO}_4/\text{FeVO}_4$                      | 0.2 M $\text{Na}_2\text{SO}_4$<br>pH = 7                     | Electrospray technique                  | 0.4<br>@ 1.23 $V_{\text{RHE}}$               | [2]  |
| 2    | $\text{BiVO}_4/\text{CoFe-NiOOH}$                  | 0.5 M $\text{Na}_2\text{SO}_4$<br>pH = 7                     | Lifting method/chemical process         | 1.54<br>@ 1.23 $V_{\text{RHE}}$              | [3]  |
| 3    | $\text{BiVO}_4/\text{rGO}/\text{NiFe}$             | 0.5 M $\text{Na}_2\text{SO}_4$<br>pH = $\sim 6.9$            | Potentiostatic electrodeposition        | 1.30<br>@ 1.23 $V_{\text{RHE}}$              | [4]  |
| 4    | $\text{CoPi}/\text{BiVO}_4$                        | 0.5 M $\text{Na}_2\text{SO}_4$                               | Photodeposition                         | 1.1<br>@ 1.23 $V_{\text{RHE}}$               | [5]  |
| 5    | $\text{CoFe-PB}/\text{BiVO}_4$                     | 0.1 M $\text{KPi}$                                           | Wet processing method                   | 1.0<br>@ 1.23 $V_{\text{RHE}}$               | [6]  |
| 6    | $\text{Ag}/\text{Ni-Zr}:\text{BiVO}_4$             | 0.1 M PBS<br>pH 7.5                                          | Electrochemical deposition process      | 3.14<br>@ 1.23 $V_{\text{RHE}}$              | [7]  |
| 7    | $\text{NiFePB}/\text{Zr}:\text{BiVO}_4$            | 0.1 M PBS<br>pH 7.5                                          | Electrodeposition process               | 3.23<br>@ 1.23 $V_{\text{RHE}}$              | [8]  |
| 8    | $\text{BiVO}_4/\text{Bi}_2\text{S}_3$              | 0.5 M $\text{Na}_2\text{SO}_4$                               | Photoassisted electrodeposition process | 1.43<br>@ 1.23 $V_{\text{RHE}}$              | [9]  |
| 9    | $\text{BiVO}_4/\text{Bi}_2\text{S}_3$              | 0.35 M $\text{Na}_2\text{SO}_3/0.25$ M $\text{Na}_2\text{S}$ | PEC transformation                      | 3.3 @ 1.23 $V_{\text{RHE}}$                  | [10] |
| 10   | $\text{Bi}_2\text{O}_3/\text{BiVO}_4$              | 0.1 M $\text{Na}_2\text{SO}_4$                               | pulsed laser deposition                 | 2.1 @ 1.23 $V_{\text{RHE}}$                  | [11] |
| 11   | $\text{Bi}/\text{Bi}_2\text{O}_3$                  | 0.2 M $\text{Na}_2\text{SO}_3$                               | Magnetron sputtering                    | 0.5 @ 0.6 $V_{\text{Ag}/\text{AgCl}}$        | [12] |
| 12   | $\text{Bi}_2\text{O}_3/\text{BiFeO}_3$             | 0.1 M $\text{KOH}$                                           | pulsed laser deposition                 | 0.084<br>@ -0.68 $V_{\text{Ag}/\text{AgCl}}$ | [13] |
| 13   | $\text{BiFeO}_3/\text{Bi}_2\text{O}_3$             | -                                                            | Flame annealing process                 | -0.21<br>@ 0.38 $V_{\text{RHE}}$             | [14] |
| 14   | $\text{BiVO}_4/\text{Bi}_2\text{S}_3/\text{FeOOH}$ | 0.1 M $\text{Na}_2\text{SO}_4$                               | Hydrothermal process                    | 0.8 @ 0.4 $V_{\text{SCE}}$                   | [15] |
| 15   | $\text{Mo}:\text{BiVO}_4$                          | 0.1 M $\text{Na}_2\text{SO}_4$                               | Pulsed laser deposition                 | 2.1 @ 1.23 $V_{\text{RHE}}$                  | [16] |
| 16   | $\text{BiVO}_4/\text{V-}$                          | 1 M $\text{KPi}$                                             | Hydrothermal method                     | 5.43 @ 1.23 $V_{\text{RHE}}$                 | [17] |

| NiOOH/FeOOH |                                                                      |                                                            |                        |                 |           |
|-------------|----------------------------------------------------------------------|------------------------------------------------------------|------------------------|-----------------|-----------|
| 17          | BiVO <sub>4</sub> /Bi <sub>2</sub> S <sub>3</sub> /BiPS <sub>4</sub> | 0.1 M<br>PBS/Na <sub>2</sub> S<br>pH 10                    | Ion-exchange reactions | 3.85 @1.23 VRHE | [18]      |
| 18.         | Zr:BiVO <sub>4</sub> @Bi <sub>2</sub> S <sub>3</sub> -CoS            | 0.1 M<br>Na <sub>2</sub> S/Na <sub>2</sub> SO <sub>4</sub> | Ion-exchange reactions | 3.09 @1.23 VRHE | This work |

**Table S3.** Electrochemical Impedance parameter obtained from the best fitted to the equivalent circuit for the EIS spectra observed under continuous irradiation conditions at 0.8 V vs RHE.

| Samples                                                   | R <sub>s</sub> (ohm) | Q1 (μMho) | R <sub>ct</sub> (Ω) | L       |
|-----------------------------------------------------------|----------------------|-----------|---------------------|---------|
| Zr:BiVO <sub>4</sub>                                      | 29.8                 | 322       | 8883                | 1.10 kH |
| Zr:BiVO <sub>4</sub> @Bi <sub>2</sub> S <sub>3</sub>      | 41.6                 | 164       | 1011                | 72.5 H  |
| Zr:BiVO <sub>4</sub> @Bi <sub>2</sub> S <sub>3</sub> .CoS | 40.5                 | 180       | 998                 | 40.3 H  |

## References

- [1] Mosa, I. M., Biswas, S., El-Sawy, A. M., Botu, V., Guild, C., Song, W., ... & Suib, S. L. 2016. Tunable mesoporous manganese oxide for high performance oxygen reduction and evolution reactions. *Journal of Materials Chemistry A*, 4(2), 620-631.
- [2] N. Li, X. Wu, M. Wang, K. Huang, J. He, W. Ma, ... & S. Feng, Facile preparation of BiVO<sub>4</sub>/FeVO<sub>4</sub> heterostructure for efficient water-splitting applications, *International Journal of Hydrogen Energy* 44 (2019) 23046–23053, <https://doi.org/10.1016/j.ijhydene.2019.07.063>.
- [3] G. Fang, G., Liu, Z., Han, C., Wang, P., Ma, X., Lv, H., ... & Tong, Z. Promising CoFe-NiOOH Ternary Polymetallic Cocatalyst for BiVO<sub>4</sub>-Based Photoanodes in Photoelectrochemical Water Splitting, *ACS Applied Energy Materials* 4 (2021) 3842–3850, <https://doi.org/10.1021/acsaem.1c00247>.
- [4] X. Han, Y. Wei, J. Su, Y. Zhao, Low-cost oriented hierarchical growth of BiVO<sub>4</sub>/rGO/NiFe nanoarrays photoanode for photoelectrochemical water splitting, *ACS Sustainable Chemistry & Engineering* 6 (2018) 14695–14703,

---

<https://doi.org/10.1021/acssuschemeng.8b03259>

- [5] Y. Wei, J. Su, X. Wan, L. Guo, L. Vayssieres, Spontaneous photoelectric field-enhancement effect prompts the low cost hierarchical growth of highly ordered heteronanostructures for solar water splitting. *Nano Research* 9 (2016) 1561–1569, <https://doi.org/10.1007/s12274-016-1050-9>.
- [6] F.S. Hegner, I. Herraiz-Cardona, D. Cardenas-Morcoso, N. López, J.R. Galán-Mascarós, S. Gimenez, Cobalt hexacyanoferrate on BiVO<sub>4</sub> photoanodes for robust water splitting, *ACS applied materials & interfaces* 9 (2017) 37671–37681, <https://doi.org/10.1021/acсами.7b09449>.
- [7] M.A. Mahadik, H.S. Chung, S.Y. Lee, M. Cho, J.S. Jang, In-situ noble fabrication of Bi<sub>2</sub>S<sub>3</sub>/BiVO<sub>4</sub> hybrid nanostructure through a photoelectrochemical transformation process for solar hydrogen production, *ACS Sustainable Chemistry & Engineering* 6 (2018) 12489–12501, <https://doi.org/10.1021/acssuschemeng.8b03140>.
- [8] M. Wang, Q. Wang, P. Guo, Z. & Jiao, In situ fabrication of nanoporous BiVO<sub>4</sub>/Bi<sub>2</sub>S<sub>3</sub> nanosheets for enhanced photoelectrochemical water splitting, *Journal of colloid and interface science*, 534 (2019) 338–342, <https://doi.org/10.1016/j.jcis.2018.09.056.1>.
- [9] M. Huang, J. Bian, W. Xiong, C. Huang, R. Zhang, Low-dimensional Mo: BiVO<sub>4</sub> photoanodes for enhanced photoelectrochemical activity, *Journal of Materials Chemistry A* 6 (2018) 3602–3609, <https://doi.org/10.1039/C7TA11132K>.
- [10] M.A. Mahadik, H.S. Chung, S.Y. Lee, M. Cho, J.S. Jang, In-situ noble fabrication of Bi<sub>2</sub>S<sub>3</sub>/BiVO<sub>4</sub> hybrid nanostructure through a photoelectrochemical transformation process for solar hydrogen production, *ACS Sustainable Chemistry & Engineering* 6 (2018) 12489–12501, <https://doi.org/10.1021/acssuschemeng.8b03140>.
- [11] S. Lee, J. Song, Y. R. Jo, K. S. Choi, J. Lee, S. Seo, ... & S. Lee, In situ growth of nanostructured BiVO<sub>4</sub>–Bi<sub>2</sub>O<sub>3</sub> mixed-phase via nonequilibrium deposition involving metal exsolution for enhanced photoelectrochemical water splitting, *ACS Applied Materials & Interfaces*, 11(2019), 44069-44076.
- [12] C. Li, J. Zhang, K. Liu, A new method of enhancing photoelectrochemical characteristics of Bi/Bi<sub>2</sub>O<sub>3</sub> electrode for hydrogen generation via water splitting. *Int. J. Electrochem. Sci.* 7 (2012) 5028-5034.



- 
- [13] X. Yan, R. Pu, R. Xie, B. Zhang, Y. Shi, W. Liu, ... & N. Yang, Design and fabrication of Bi<sub>2</sub>O<sub>3</sub>/BiFeO<sub>3</sub> heterojunction film with improved photoelectrochemical performance, *Applied Surface Science* 552 (2022) 149442.
- [14] S. Man, X. Leng, J. Bai, Z. Li, L. Xu, Facile synthesis of BiFeO<sub>3</sub>/Bi<sub>2</sub>O<sub>3</sub> composite photocathode with improved photoelectrochemical performance. *Materials Letters*, 323 (2022) 132591.
- [15] M. Wang, Q. Wang, P. Guo, Z. & Jiao, In situ fabrication of nanoporous BiVO<sub>4</sub>/Bi<sub>2</sub>S<sub>3</sub> nanosheets for enhanced photoelectrochemical water splitting, *Journal of colloid and interface science*, 534 (2019) 338–342, <https://doi.org/10.1016/j.jcis.2018.09.056.1>.
- [16] M. Huang, J. Bian, W. Xiong, C. Huang, R. Zhang, Low-dimensional Mo: BiVO<sub>4</sub> photoanodes for enhanced photoelectrochemical activity, *Journal of Materials Chemistry A* 6 (2018) 3602–3609, <https://doi.org/10.1039/C7TA11132K>.
- [17] R. T. Gao, D. He, L. Wu, K. Hu, X. Liu, Y. Su, L. Wang, Towards Long-Term Photostability of Nickel Hydroxide/BiVO<sub>4</sub> Photoanodes for Oxygen Evolution Catalysts via In Situ Catalyst Tuning. *Angewandte Chemie* 132 (2020) 6272-6277, <https://doi.org/10.1002/ange.201915671>.
- [18] M. N. Shaddad, P. Arunachalam, M. Hezam, N. M. BinSaedan, S. Gimenez, J. Bisquert, A. M. Al-Mayouf, Facile fabrication of heterostructured BiPS<sub>4</sub>-Bi<sub>2</sub>S<sub>3</sub>-BiVO<sub>4</sub> photoanode for enhanced stability and photoelectrochemical water splitting performance. *Journal of Catalysis* 418 (2023), 51-63.
